# Supplementary material for: Diet affects reproductive development and microbiota composition in honey bees
Source: PubMed Central journal article supplement — Anim Microbiome. 2024 Nov 5;6:64. doi: 10.1186/s42523-024-00350-3 (PMC11539837; doi:10.1186/s42523-024-00350-3), 2024-11-05
Supplement: 42523_2024_350_MOESM3_ESM.pdf [file 42523_2024_350_MOESM3_ESM.pdf]

## Supplementary Material

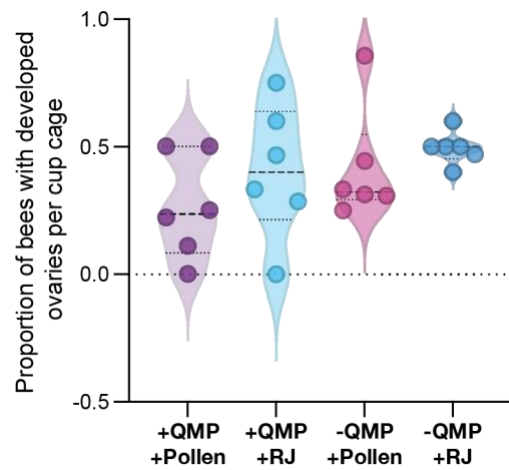

**Figure S1.** Violin plot showing the proportion of bees with developed ovaries (stage 2-3) from each replicate cup cage within each experimental group.

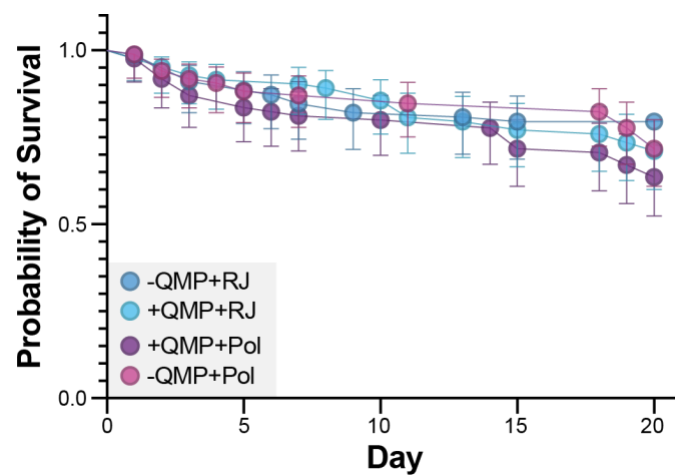

**Figure S2.** Kaplan-Meier curve showing the proportion of survival of honey bees from each experimental group over the course of the experiment. No significant differences were observed in proportion of survival over 21 days (Mantel-Cox Log-rank test).

**Dataset S1.** Relative abundance of taxa in each individual bee classified to the species-level (L7).

**Dataset S2.** Metadata table for the raw sequencing data uploaded to the NCBI SRA database.
